# Supplementary material for: Non-degradative Ubiquitination of Protein Kinases
Source: PubMed Central journal article supplement (PMC4890936; doi:10.1371/journal.pcbi.1004898), 2016-06-02
Supplement: pcbi.1004898.s001.pdf [file pcbi.1004898.s001.pdf]

**S1 Table.** Details of simulation solvent box for ZAP-70 constructs.

| <b>Construct</b>                  | <b># of water molecules in box</b> | <b>Box dimensions (Å)</b> |     |     |
|-----------------------------------|------------------------------------|---------------------------|-----|-----|
|                                   |                                    |                           |     |     |
| Active-state control              | 12,588                             | 72                        | 78  | 75  |
| Active-state K377-ubiquitinated   | 35,867                             | 102                       | 104 | 108 |
| Active-state K476-ubiquitinated   | 15,996                             | 88                        | 82  | 76  |
| Active-state K377-acetylated      | 12,581                             | 73                        | 79  | 77  |
| Active-state K377-Ig domain       | 75,547                             | 130                       | 134 | 136 |
| Inactive-state control            | 13,029                             | 75                        | 77  | 75  |
| Inactive-state K377-ubiquitinated | 38,834                             | 106                       | 109 | 107 |
| Inactive-state K476-ubiquitinated | 15,691                             | 87                        | 82  | 76  |
| Inactive-state K476-acetylated    | 13,027                             | 77                        | 79  | 77  |
