# Supplementary material for: Non-degradative Ubiquitination of Protein Kinases
Source: PubMed Central journal article supplement (PMC4890936; doi:10.1371/journal.pcbi.1004898), 2016-06-02
Supplement: pcbi.1004898.s002.pdf [file pcbi.1004898.s002.pdf]

**S2 Table.** HIV dependence of ubiquitination sites identified in Jurkat and HEK293 cells.

| <b>Jurkat + PTMfunc</b>                                 | <b>HIV dependence</b> | <b>Abundance also affected</b> |
|---------------------------------------------------------|-----------------------|--------------------------------|
| <b>% of proteasome-sensitive ubiquitination sites</b>   | 2%                    | 0%                             |
| <b>% of proteasome-insensitive ubiquitination sites</b> | 0%                    | 0%                             |
| <b>% of all ubiquitination sites</b>                    | 4%                    | 0%                             |
|                                                         |                       |                                |
| <b>HEK293</b>                                           | <b>HIV dependence</b> |                                |
| <b>% of proteasome-sensitive ubiquitination sites</b>   | 84%                   |                                |
| <b>% of proteasome-insensitive ubiquitination sites</b> | 44%                   |                                |
| <b>% of all ubiquitination sites</b>                    | 76%                   |                                |
