# Supplementary material for: Non-degradative Ubiquitination of Protein Kinases
Source: PubMed Central journal article supplement (PMC4890936; doi:10.1371/journal.pcbi.1004898), 2016-06-02
Supplement: pcbi.1004898.s003.pdf [file pcbi.1004898.s003.pdf]

**S3 Table.** P-value statistics testing the hypothesis that simulation metrics have the same distribution as the unmodified control simulations started from the same ZAP-70 crystal structure. Using the means of each simulation as the data.

| <b>Data are means of each simulation</b>                                             | <b>K377-ubiq</b>        | <b>K476-ubiq</b>        | <b>K377-acet</b>       | <b>K476-acet</b>       | <b>K377-Ig domain</b> |
|--------------------------------------------------------------------------------------|-------------------------|-------------------------|------------------------|------------------------|-----------------------|
| <b>Active state F349 C<math>\alpha</math> - D379 C<math>\beta</math> distance</b>    | 1.422x10 <sup>-10</sup> | 0.1060                  | 0.6744                 |                        | 0.1031                |
| <b>Inactive state F349 C<math>\alpha</math> - D379 C<math>\beta</math> distance</b>  | 0.3394                  | 3.124x10 <sup>-14</sup> |                        | 3.026x10 <sup>-4</sup> |                       |
| <b>Active state helicity</b>                                                         | 2.219x10 <sup>-6</sup>  | 0.03266                 | 5.277x10 <sup>-4</sup> |                        | 0.04564               |
| <b>Inactive state helicity</b>                                                       | 0.3463                  | 0.1031                  |                        | 0.9098                 |                       |
| <b>Active state N348 C<math>\alpha</math> - W501 C<math>\alpha</math> distance</b>   | 7.084x10 <sup>-3</sup>  | 0.7338                  | 0.5798                 |                        | 0.3673                |
| <b>Inactive state N348 C<math>\alpha</math> - W501 C<math>\alpha</math> distance</b> | 6.334x10 <sup>-11</sup> | 1.081x10 <sup>-5</sup>  |                        | 0.7138                 |                       |
