# Supplementary material for: Non-degradative Ubiquitination of Protein Kinases
Source: PubMed Central journal article supplement (PMC4890936; doi:10.1371/journal.pcbi.1004898), 2016-06-02
Supplement: pcbi.1004898.s004.pdf [file pcbi.1004898.s004.pdf]

**S4 Table.** P-value statistics testing the hypothesis that simulation metrics have the same distribution as the unmodified control simulations started from the same ZAP-70 crystal structure. Using the medians of each simulation as the data.

| <b>Data are medians of each simulation</b>                                           | <b>K377-ubiq</b>        | <b>K476-ubiq</b>        | <b>K377-acet</b> | <b>K476-acet</b>       | <b>K377-Ig domain</b> |
|--------------------------------------------------------------------------------------|-------------------------|-------------------------|------------------|------------------------|-----------------------|
| <b>Active state F349 C<math>\alpha</math> - D379 C<math>\beta</math> distance</b>    | 3.787x10 <sup>-8</sup>  | 0.1616                  | 0.8992           |                        | 0.1460                |
| <b>Inactive state F349 C<math>\alpha</math> - D379 C<math>\beta</math> distance</b>  | 0.4192                  | 9.967x10 <sup>-13</sup> |                  | 5.277x10 <sup>-4</sup> |                       |
| <b>Active state helicity</b>                                                         | 4.394x10 <sup>-6*</sup> | 0.09151*                | 0.04873*         |                        | 0.1703*               |
| <b>Inactive state helicity</b>                                                       | 0.3879*                 | 0.09907*                |                  | 0.8886*                |                       |
| <b>Active state N348 C<math>\alpha</math> - W501 C<math>\alpha</math> distance</b>   | 5.479x10 <sup>-3</sup>  | 0.6647                  | 0.5616           |                        | 0.3327                |
| <b>Inactive state N348 C<math>\alpha</math> - W501 C<math>\alpha</math> distance</b> | 3.141x10 <sup>-11</sup> | 1.902x10 <sup>-5</sup>  |                  | 0.8614*                |                       |

\*indicates p-values that could not be computed exactly with the Wilcoxon test in R because there were duplicate values.
