# Supplementary material for: Non-degradative Ubiquitination of Protein Kinases
Source: PLoS Comput Biol. 2016 Jun 2;12(6):e1004898. doi: 10.1371/journal.pcbi.1004898 (PMC4890936; doi:10.1371/journal.pcbi.1004898)
Supplement: S2 Dataset — There is a row for each ubiquitination site and the columns tell the name of the protein ubiquitinated, the residue number of the modification, the corresponding aligned residue on PKA (if there is one), the corresponding aligned residue on ZAP-70 (if there is one), whether the site is proteasome dependent or independent (if known), whether the site is on the kinase domain, whether the site is on any folded protein domain, whether the modification shows any dependence on HIV infection (if known), whether the abundance of the corresponding peptide shows any dependence on HIV infection (if known), whether the ubiquitination site is near a phosphorylation site, whether the ubiquitination site is near a phosphorylation hot spot as designated by the PTMfunc database, and the source of the modification (Jurkat cell experiment, PTMfunc database, or both). (XLSX) [file pcbi.1004898.s012.xlsx]

## Sheet: Sheet1
protein name	modified site	PKA alignment	ZAP-70 alignment	proteasome dependence	kinase domain	folded domain	HIV dependence	Abundance HIV dependence	phosphorylation site	phosphorylation hot spot	data source
Q15303	745	69	364	-	kindom	dom	-	-	-	-	PTMfunc
Q15303	1265	-	-	-	notkindom	nodom	-	-	nearphos	-	PTMfunc
P04626	150	-	-	-	notkindom	nodom	-	-	-	-	PTMfunc
P04626	175	-	-	-	notkindom	nodom	-	-	-	-	PTMfunc
P04626	724	-	-	-	notkindom	dom	-	-	-	-	PTMfunc
P04626	736	60	354	-	kindom	dom	-	-	nearphos	-	PTMfunc
P04626	747	69	364	-	kindom	dom	-	-	-	-	PTMfunc
P04626	753	73	369	-	kindom	dom	-	-	-	-	PTMfunc
P04626	860	182	476	-	kindom	dom	-	-	-	-	PTMfunc
P04626	887	204	504	-	kindom	dom	-	-	-	-	PTMfunc
P00533	212	-	-	-	notkindom	nodom	-	-	-	-	PTMfunc
P00533	708	-	333	-	notkindom	nodom	-	-	-	-	PTMfunc
P00533	713	45	338	-	kindom	dom	-	-	-	-	PTMfunc
P00533	714	-	-	-	notkindom	dom	-	-	-	-	PTMfunc
P00533	716	-	-	-	notkindom	dom	-	-	nearphos	-	PTMfunc
P00533	728	60	354	-	kindom	dom	-	-	nearphos	-	PTMfunc
P00533	737	-	-	-	notkindom	dom	-	-	-	-	PTMfunc
P00533	739	69	364	-	kindom	dom	-	-	-	-	PTMfunc
P00533	754	-	-	-	notkindom	dom	-	-	nearphos	-	PTMfunc
P00533	757	-	381	-	notkindom	dom	-	-	-	-	PTMfunc
P00533	823	153	447	-	kindom	dom	-	-	-	-	PTMfunc
P00533	846	176	470	-	kindom	dom	-	-	-	-	PTMfunc
P00533	860	190	484	-	kindom	dom	-	-	-	-	PTMfunc
P00533	867	-	489	-	notkindom	dom	-	-	nearphos	nearhot	PTMfunc
P00533	913	-	-	-	notkindom	dom	-	-	-	-	PTMfunc
P00533	929	254	554	-	kindom	dom	-	-	-	-	PTMfunc
P00533	960	283	585	-	kindom	dom	-	-	-	-	PTMfunc
P00533	970	298	595	-	kindom	dom	-	-	-	-	PTMfunc
P00533	1061	-	-	-	notkindom	nodom	-	-	nearphos	-	PTMfunc
Q96QT4	4	-	210	-	notkindom	nodom	hivind	-	-	-	Jurkat
Q96QT4	667	-	-	-	notkindom	nodom	-	-	-	-	PTMfunc
O14874	48	-	-	-	notkindom	nodom	-	-	-	-	PTMfunc
O43353	182	-	-	-	notkindom	dom	-	-	-	-	PTMfunc
O43353	203	217	517	-	kindom	dom	-	-	-	-	PTMfunc
O43353	209	219	519	-	kindom	dom	-	-	-	-	PTMfunc
Q96S38	651	-	-	-	notkindom	nodom	-	-	-	-	PTMfunc
Q96S38	674	-	-	-	notkindom	nodom	-	-	-	-	PTMfunc
Q96S38	759	-	-	-	notkindom	nodom	-	-	-	-	PTMfunc
Q96S38	869	-	-	-	notkindom	dom	-	-	nearphos	-	PTMfunc
P49761	334	73	369	-	kindom	dom	hivind	abundhivind	-	-	Jurkat
Q9HCP0	317	299	596	-	notkindom	nodom	-	-	-	-	PTMfunc
P48730	122	-	-	-	notkindom	dom	hivind	-	-	-	Jurkat
P48730	130	169	463	-	kindom	dom	-	-	-	-	PTMfunc
P48730	140	-	-	-	notkindom	dom	hivind	-	-	-	Both
P49674	122	-	-	-	notkindom	dom	hivind	-	-	-	Both
P49674	140	-	-	-	notkindom	dom	hivind	-	-	-	Jurkat
P49674	263	281	583	-	kindom	dom	-	-	-	-	PTMfunc
Q8N752	130	-	-	protdep	notkindom	dom	hivind	abundhivind	-	-	Both
Q8N752	162	190	484	-	kindom	dom	hivind	abundhivind	-	-	Jurkat
Q8N752	163	191	485	-	kindom	dom	hivind	abundhivind	-	-	Jurkat
Q8N752	304	-	-	-	notkindom	nodom	hivind	abundhivind	-	-	Jurkat
P48729	8	31	-	-	notkindom	nodom	hivind	abundhivind	-	-	Jurkat
P48729	62	108	402	protdep	kindom	dom	hivind	abundhivind	-	-	Both
P48729	65	-	407	protind	notkindom	dom	hivind	abundhivind	-	-	Both
P48729	162	190	484	-	kindom	dom	hivind	abundhivind	-	-	Jurkat
P48729	163	191	485	-	kindom	dom	hivind	abundhivind	-	-	Jurkat
P48729	225	-	-	protind	notkindom	dom	hivind	abundhivind	-	-	Jurkat
P48729	229	-	-	-	notkindom	dom	hivdep	abundhivind	-	-	Jurkat
P48729	304	-	-	-	notkindom	nodom	hivind	abundhivind	-	-	Jurkat
P54619	234	196	-	-	kindom	dom	hivind	abundhivind	-	-	Jurkat
P54619	264	-	-	-	notkindom	nodom	hivind	abundhivind	-	-	Jurkat
Q9UGJ0	475	-	-	protdep	notkindom	dom	-	-	-	-	PTMfunc
P36897	91	-	-	-	notkindom	nodom	-	-	-	-	PTMfunc
P36897	213	52	346	-	kindom	dom	-	-	-	-	PTMfunc
P36897	232	73	369	-	kindom	dom	-	-	-	-	PTMfunc
P36897	391	-	-	-	notkindom	dom	-	-	-	-	PTMfunc
P36897	397	217	517	-	kindom	dom	-	-	-	-	PTMfunc
P36897	449	255	557	-	kindom	dom	-	-	-	-	PTMfunc
P36897	502	307	601	protind	notkindom	nodom	hivind	-	-	-	Both
P28482	55	74	370	-	kindom	dom	hivind	-	-	-	Jurkat
P28482	99	115	408	-	kindom	dom	-	-	-	-	PTMfunc
P28482	203	214	514	-	kindom	dom	hivind	-	nearphos	-	Both
P28482	207	218	518	-	kindom	dom	hivind	-	-	-	Jurkat
P28482	292	272	574	protdep	kindom	dom	-	-	-	-	PTMfunc
P28482	344	-	-	-	notkindom	nodom	-	-	-	-	PTMfunc
P27361	32	33	319	-	notkindom	nodom	hivind	-	-	-	Jurkat
P27361	72	74	370	-	kindom	dom	hivind	-	-	-	Jurkat
P27361	181	182	476	-	kindom	dom	-	-	-	-	PTMfunc
P27361	220	214	514	-	kindom	dom	hivind	-	nearphos	-	Jurkat
P27361	224	218	518	-	kindom	dom	hivind	-	-	-	Jurkat
P27361	287	-	-	-	notkindom	dom	hivind	-	-	-	Jurkat
P27361	289	-	-	-	notkindom	dom	hivind	-	-	-	Jurkat
P27361	294	-	-	-	notkindom	dom	-	-	-	-	PTMfunc
P27361	317	280	582	-	kindom	dom	hivind	-	-	-	Jurkat
Q16539	45	-	359	-	notkindom	dom	hivind	abundhivind	-	-	Jurkat
Q16539	139	156	450	protdep	kindom	dom	hivind	abundhivind	-	-	Jurkat
Q16539	248	-	550	protind	notkindom	dom	hivind	abundhivind	-	-	Jurkat
Q16539	249	250	551	-	kindom	dom	hivind	abundhivind	-	-	Jurkat
O15264	226	242	543	-	kindom	dom	-	-	-	-	PTMfunc
Q00534	3	33	319	protdep	notkindom	nodom	hivind	abundhivind	-	-	Jurkat
Q00534	26	57	351	-	kindom	dom	hivind	abundhivind	nearphos	nearhot	Both
Q00534	29	60	354	-	kindom	dom	hivind	abundhivind	-	-	Jurkat
Q00534	34	-	359	-	notkindom	dom	-	abundhivind	-	-	Jurkat
Q00534	147	169	463	protdep	kindom	dom	hivind	abundhivind	-	-	Both
Q00534	160	182	476	-	kindom	dom	hivind	abundhivind	-	-	Jurkat
Q00534	230	249	-	-	kindom	dom	-	-	-	-	PTMfunc
Q00534	257	-	-	protdep	notkindom	dom	hivind	abundhivind	-	-	Both
Q00534	264	-	-	protdep	notkindom	dom	-	-	-	-	PTMfunc
Q00534	274	267	569	protdep	kindom	dom	hivind	abundhivind	-	-	Both
Q00534	279	272	574	-	kindom	dom	hivind	abundhivind	-	-	Jurkat
Q00534	287	280	582	protind	kindom	dom	hivind	abundhivind	-	-	Jurkat
Q00534	307	307	601	-	notkindom	nodom	hivind	abundhivind	-	-	Jurkat
P11802	22	60	354	-	kindom	dom	hivind	abundhivind	-	-	Both
P11802	35	73	369	-	kindom	dom	hivind	abundhivind	-	-	Both
P11802	106	135	428	protdep	kindom	dom	-	-	-	-	PTMfunc
P11802	118	145	439	-	kindom	dom	-	-	-	-	PTMfunc
P11802	142	169	463	protdep	kindom	dom	-	-	-	-	PTMfunc
P11802	155	182	476	-	kindom	dom	hivind	abundhivind	-	-	Both
P11802	211	236	537	-	kindom	dom	hivind	abundhivind	-	-	Jurkat
P11802	297	300	597	-	notkindom	nodom	hivind	abundhivind	-	-	Jurkat
Q15131	68	73	369	-	kindom	dom	-	-	-	-	PTMfunc
Q15131	76	-	380	-	notkindom	dom	-	-	-	-	PTMfunc
Q8IZL9	34	74	370	-	kindom	dom	hivind	-	-	-	Jurkat
P50613	139	169	463	-	kindom	dom	-	-	-	-	PTMfunc
P50613	160	190	484	protdep	kindom	dom	-	-	nearphos	nearhot	PTMfunc
P50613	291	294	591	-	kindom	dom	hivind	abundhivind	-	-	Both
P50613	328	-	-	-	notkindom	nodom	-	-	-	-	PTMfunc
Q00535	20	60	354	protdep	kindom	dom	hivind	abundhivind	nearphos	nearhot	Jurkat
Q00535	22	62	356	-	kindom	dom	hivind	abundhivind	-	-	Jurkat
Q00535	33	73	369	protdep	kindom	dom	hivind	abundhivind	-	-	Jurkat
Q00535	56	96	391	-	kindom	dom	hivind	abundhivind	-	-	Jurkat
Q00535	128	169	463	-	kindom	dom	hivind	abundhivind	-	-	Both
Q00535	141	182	476	protind	kindom	dom	hivind	abundhivind	-	-	Jurkat
Q00535	237	-	556	-	notkindom	dom	-	-	nearphos	-	PTMfunc
Q00535	268	275	577	protind	kindom	dom	hivind	abundhivind	-	-	Both
P06493	6	46	-	-	kindom	dom	hivind	abundhivind	nearphos	-	Jurkat
P06493	9	49	343	protdep	kindom	dom	hivind	abundhivind	-	-	Both
P06493	20	60	354	protdep	kindom	dom	hivind	abundhivind	nearphos	nearhot	Both
P06493	24	64	358	protdep	kindom	dom	hivind	abundhivind	-	-	Both
P06493	33	73	369	protdep	kindom	dom	hivind	abundhivind	-	-	Jurkat
P06493	34	74	370	protdep	kindom	dom	hivind	abundhivind	-	-	Jurkat
P06493	56	96	391	protdep	kindom	dom	hivind	abundhivind	-	-	Both
P06493	89	-	-	-	notkindom	dom	-	-	-	-	PTMfunc
P06493	130	169	463	-	kindom	dom	hivind	abundhivind	-	-	Jurkat
P06493	139	-	-	protdep	notkindom	dom	hivind	abundhivind	-	-	Jurkat
P06493	143	182	476	protdep	kindom	dom	hivind	abundhivind	-	-	Both
P06493	201	236	537	-	kindom	dom	hivind	abundhivind	-	-	Jurkat
P06493	238	-	556	-	notkindom	dom	hivind	abundhivind	-	-	Jurkat
P06493	243	258	560	-	kindom	dom	hivind	abundhivind	-	-	Jurkat
P06493	245	-	-	-	notkindom	dom	hivind	abundhivind	-	-	Jurkat
P06493	254	-	-	-	notkindom	dom	hivind	abundhivind	-	-	Jurkat
P06493	274	280	582	protdep	kindom	dom	hivind	abundhivind	-	-	Jurkat
P06493	279	290	587	protdep	kindom	dom	hivind	abundhivind	-	-	Jurkat
P06493	295	-	-	protdep	notkindom	nodom	hivind	abundhivind	-	-	Jurkat
P24941	9	49	343	-	kindom	dom	-	-	-	-	PTMfunc
P24941	20	60	354	protdep	kindom	dom	hivind	abundhivind	nearphos	nearhot	Both
P24941	24	64	358	protdep	kindom	dom	hivind	abundhivind	-	-	Both
P24941	33	73	369	protdep	kindom	dom	hivind	abundhivind	-	-	Both
P24941	34	74	370	-	kindom	dom	hivind	abundhivind	-	-	Jurkat
P24941	56	96	391	-	kindom	dom	-	-	-	-	PTMfunc
P24941	129	169	463	protdep	kindom	dom	-	-	-	-	PTMfunc
P24941	142	182	476	-	kindom	dom	-	-	-	-	PTMfunc
P24941	237	-	556	protdep	notkindom	dom	-	-	-	-	PTMfunc
P24941	242	258	560	-	kindom	dom	-	-	-	-	PTMfunc
P24941	250	-	-	protdep	notkindom	dom	-	-	-	-	PTMfunc
P24941	273	280	582	-	kindom	dom	-	-	-	-	PTMfunc
P24941	278	290	587	-	kindom	dom	hivind	abundhivind	-	-	Both
P24941	291	305	-	-	notkindom	nodom	-	-	-	-	PTMfunc
O43318	158	169	463	-	kindom	dom	-	-	-	-	PTMfunc
O43318	209	219	519	-	kindom	dom	-	-	-	-	PTMfunc
O43318	346	-	-	-	notkindom	nodom	-	-	-	-	PTMfunc
O43318	590	-	-	-	notkindom	nodom	-	-	-	-	PTMfunc
Q04912	86	-	-	-	notkindom	dom	-	-	-	-	PTMfunc
Q04912	222	-	-	protdep	notkindom	dom	-	-	-	-	PTMfunc
Q04912	1114	73	369	-	kindom	dom	-	-	-	-	PTMfunc
P16591	610	94	388	-	kindom	dom	-	-	-	-	PTMfunc
P16591	699	182	476	-	kindom	dom	hivind	-	-	-	Jurkat
P16591	720	200	499	-	kindom	dom	-	-	-	-	PTMfunc
P07332	694	178	472	-	kindom	dom	hivind	-	-	-	Jurkat
P07332	698	182	476	-	kindom	dom	hivind	-	-	-	Jurkat
P07332	725	204	504	protdep	kindom	dom	hivind	-	-	-	Both
P43403	75	-	75	-	notkindom	dom	hivind	-	-	-	Jurkat
P43403	176	-	176	-	notkindom	dom	hivind	-	nearphos	-	Jurkat
P43403	186	-	186	-	notkindom	dom	hivind	-	-	-	Jurkat
P43403	193	-	193	protind	notkindom	dom	-	-	-	-	Jurkat
P43403	217	-	217	protind	notkindom	dom	hivind	-	-	-	Jurkat
P43403	220	-	220	-	notkindom	dom	hivind	-	-	-	Jurkat
P43403	361	66	361	protind	kindom	dom	hivind	-	-	-	Jurkat
P43403	362	67	362	protind	kindom	dom	hivind	-	-	-	Jurkat
P43403	372	-	372	-	notkindom	dom	hivind	-	-	-	Jurkat
P43403	377	83	377	protind	kindom	dom	hivind	-	-	-	Jurkat
P43403	455	161	455	protind	kindom	dom	hivind	-	-	-	Jurkat
P43403	476	182	476	protind	kindom	dom	hivind	-	nearphos	-	Jurkat
P43403	484	190	484	protind	kindom	dom	hivind	-	-	-	Jurkat
P43403	500	201	500	-	kindom	dom	hivind	-	-	-	Jurkat
P43403	538	237	538	protind	kindom	dom	hivind	-	-	-	Jurkat
P43403	541	240	541	protdep	kindom	dom	hivind	-	-	-	Jurkat
P43403	556	-	556	protind	notkindom	dom	hivind	-	-	-	Jurkat
P43403	603	-	603	protind	notkindom	nodom	hivind	-	-	-	Jurkat
P43403	613	-	613	protind	notkindom	nodom	-	-	-	-	Jurkat
P43405	517	190	484	protind	kindom	dom	-	-	-	-	PTMfunc
P41240	43	-	122	-	notkindom	dom	hivind	abundhivind	-	-	Jurkat
P41240	76	-	157	-	notkindom	nodom	hivind	abundhivind	-	-	Jurkat
P41240	86	-	167	-	notkindom	dom	hivind	abundhivind	-	-	Jurkat
P41240	169	-	252	-	notkindom	dom	hivind	abundhivind	-	-	Jurkat
P41240	193	42	328	protdep	notkindom	nodom	hivind	abundhivind	-	-	Jurkat
P41240	196	45	338	protind	kindom	dom	hivind	abundhivind	-	-	Both
P41240	203	52	346	-	kindom	dom	hivind	abundhivind	-	-	Jurkat
P41240	222	73	369	-	kindom	dom	hivind	abundhivind	-	-	Jurkat
P41240	337	190	484	-	kindom	dom	hivind	abundhivind	-	-	Jurkat
P41240	347	201	500	-	kindom	dom	hivind	abundhivind	-	-	Jurkat
P41240	351	204	504	-	kindom	dom	hivind	abundhivind	-	-	Jurkat
P41240	393	244	546	-	kindom	dom	hivind	abundhivind	-	-	Jurkat
Q08881	13	-	-	protdep	notkindom	dom	hivind	abundhivind	-	-	Jurkat
Q08881	14	-	-	-	notkindom	dom	hivdep	abundhivind	-	-	Jurkat
Q08881	52	-	-	-	notkindom	dom	hivind	abundhivind	-	-	Jurkat
Q08881	67	-	-	-	notkindom	dom	hivind	abundhivind	-	-	Jurkat
Q08881	107	-	-	-	notkindom	dom	hivind	abundhivind	-	-	Jurkat
Q08881	129	-	-	-	notkindom	nodom	hivind	abundhivind	-	-	Jurkat
Q08881	138	-	-	-	notkindom	nodom	hivdep	abundhivind	-	-	Jurkat
Q08881	150	-	36	protdep	notkindom	nodom	hivdep	abundhivind	-	-	Jurkat
Q08881	242	-	166	-	notkindom	dom	hivdep	abundhivind	-	-	Jurkat
Q08881	258	-	183	-	notkindom	dom	hivdep	abundhivind	-	-	Jurkat
Q08881	296	-	214	-	notkindom	dom	hivind	abundhivind	-	-	Jurkat
Q08881	344	-	260	-	notkindom	nodom	hivdep	abundhivind	-	-	Jurkat
Q08881	391	73	369	-	kindom	dom	hivind	abundhivind	-	-	Jurkat
Q08881	497	182	476	protdep	kindom	dom	hivind	abundhivind	-	-	Jurkat
Q08881	519	201	500	protdep	kindom	dom	hivind	abundhivind	-	-	Jurkat
Q08881	523	204	504	protdep	kindom	dom	hivind	abundhivind	-	-	Jurkat
P42680	51	-	-	-	notkindom	dom	-	-	-	-	PTMfunc
P06239	130	-	166	protind	notkindom	dom	hivind	abundhivind	-	-	Jurkat
P06239	179	-	209	protdep	notkindom	dom	hivind	abundhivind	-	-	Jurkat
P06239	182	-	212	protind	notkindom	dom	hivind	abundhivind	-	-	Jurkat
P06239	246	45	338	protind	kindom	dom	hivind	abundhivind	-	-	Jurkat
P06239	269	-	365	protind	notkindom	dom	hivind	abundhivind	-	-	Jurkat
P06239	273	73	369	-	kindom	dom	hivind	abundhivind	-	-	Jurkat
P06239	276	-	372	-	notkindom	dom	hivind	abundhivind	-	-	Jurkat
P06239	293	96	391	protind	kindom	dom	hivind	abundhivind	-	-	Jurkat
P06239	335	-	-	protind	notkindom	dom	hivind	abundhivind	-	-	Jurkat
P06239	340	143	437	-	kindom	dom	hivind	abundhivind	-	-	Jurkat
P06239	379	182	476	protind	kindom	dom	hivind	abundhivind	-	-	Jurkat
P06239	401	201	500	-	kindom	dom	hivind	abundhivind	-	-	Jurkat
P06239	405	204	504	-	kindom	dom	hivind	abundhivind	-	-	Jurkat
P36507	40	-	305	-	notkindom	nodom	-	-	-	-	PTMfunc
P36507	51	-	-	protdep	notkindom	nodom	-	-	-	-	PTMfunc
P36507	61	33	319	-	notkindom	nodom	hivind	abundhivind	-	-	Both
P36507	68	40	326	protdep	notkindom	nodom	-	-	-	-	PTMfunc
P36507	88	60	354	-	kindom	dom	hivind	abundhivind	-	-	Jurkat
P36507	101	73	369	-	kindom	dom	hivind	abundhivind	-	-	Jurkat
P36507	108	82	-	-	kindom	dom	hivind	abundhivind	-	-	Both
P36507	196	169	463	protdep	kindom	dom	hivind	abundhivind	nearphos	-	Both
P36507	209	182	476	-	kindom	dom	-	-	-	-	PTMfunc
P36507	361	290	587	-	kindom	dom	hivind	abundhivind	-	-	Jurkat
P36507	370	299	596	-	notkindom	nodom	hivind	abundhivind	nearphos	-	Jurkat
Q9UEE5	71	54	348	-	kindom	dom	hivind	-	-	-	Jurkat
Q9UEE5	188	169	463	-	kindom	dom	-	-	-	-	PTMfunc
O94768	37	48	342	-	kindom	dom	hivind	abundhivind	-	-	Jurkat
O94768	43	54	348	-	kindom	dom	hivind	abundhivind	-	-	Jurkat
O94768	53	65	-	protdep	kindom	dom	hivind	abundhivind	-	-	Both
O94768	62	73	369	-	kindom	dom	hivind	abundhivind	-	-	Jurkat
O94768	88	-	-	-	notkindom	dom	hivind	abundhivind	-	-	Jurkat
O94768	185	191	485	-	kindom	dom	hivind	abundhivind	-	-	Jurkat
O43293	167	191	485	-	kindom	dom	-	-	-	-	PTMfunc
O43293	276	299	596	-	notkindom	nodom	-	-	-	-	PTMfunc
O43293	327	331	-	protdep	notkindom	nodom	hivind	-	-	-	Both
O43293	425	-	-	-	notkindom	nodom	-	-	-	-	PTMfunc
Q16566	199	197	497	-	kindom	dom	hivind	-	nearphos	nearhot	Jurkat
Q16566	331	-	-	-	notkindom	nodom	hivind	-	-	-	Jurkat
Q9P289	40	60	354	-	kindom	dom	hivind	-	-	-	Jurkat
Q9P289	146	169	463	-	kindom	dom	hivind	-	-	-	Jurkat
Q9P289	175	-	-	protdep	notkindom	dom	hivind	-	-	-	Jurkat
Q9P289	398	-	-	-	notkindom	nodom	hivind	-	-	-	Jurkat
Q9Y6E0	52	60	354	-	kindom	dom	hivind	-	-	-	Jurkat
Q9Y6E0	187	-	-	protdep	notkindom	dom	hivind	-	-	-	Jurkat
Q9Y6E0	245	-	-	-	notkindom	dom	-	-	-	-	PTMfunc
O00506	142	169	463	-	kindom	dom	hivind	-	-	-	Both
O00506	171	-	-	protdep	notkindom	dom	hivind	-	nearphos	nearhot	Jurkat
Q13177	113	-	-	protind	notkindom	nodom	hivind	-	-	-	Jurkat
Q13177	117	-	-	protind	notkindom	nodom	hivind	-	-	-	Jurkat
Q13177	136	-	218	protind	notkindom	nodom	hivind	-	nearphos	-	Jurkat
Q13177	138	-	220	-	notkindom	nodom	hivind	-	nearphos	-	Jurkat
Q13177	370	169	463	-	kindom	dom	hivind	-	-	-	Jurkat
Q13177	399	-	-	protind	notkindom	dom	hivind	-	nearphos	nearhot	Jurkat
Q13177	492	290	587	protind	kindom	dom	-	-	-	-	Jurkat
Q13153	420	-	-	protind	notkindom	dom	hivind	-	-	-	Jurkat
O75914	124	-	-	protind	notkindom	nodom	hivind	-	-	-	Jurkat
O75914	128	-	-	protind	notkindom	nodom	hivind	-	-	-	Jurkat
O75914	433	-	-	protind	notkindom	dom	hivind	-	-	-	Jurkat
O75914	526	290	587	protind	kindom	dom	-	-	-	-	Jurkat
Q8TDX7	63	73	369	protind	kindom	dom	hivind	abundhivind	-	-	Jurkat
Q8TDX7	64	74	370	protind	kindom	dom	hivind	abundhivind	-	-	Jurkat
Q8TDX7	74	84	-	protdep	kindom	dom	hivind	abundhivind	-	-	Jurkat
Q8TDX7	81	91	385	-	kindom	dom	hivind	abundhivind	-	-	Jurkat
Q8TDX7	189	-	-	-	notkindom	dom	hivind	abundhivind	nearphos	nearhot	Jurkat
Q8TDX7	248	-	-	-	notkindom	dom	hivind	abundhivind	-	-	Jurkat
Q9P1W9	40	52	346	-	kindom	dom	-	-	-	-	PTMfunc
Q9P1W9	61	73	369	-	kindom	dom	-	-	-	-	PTMfunc
Q9P1W9	89	97	392	-	kindom	dom	-	-	-	-	PTMfunc
Q9P1W9	165	169	463	-	kindom	dom	-	-	-	-	PTMfunc
Q9P1W9	179	182	476	-	kindom	dom	-	-	-	-	PTMfunc
Q86V86	30	34	320	-	notkindom	nodom	-	-	-	-	PTMfunc
Q86V86	38	42	328	-	notkindom	nodom	-	-	-	-	PTMfunc
Q86V86	69	73	369	-	kindom	dom	hivind	-	-	-	Both
Q86V86	73	77	-	-	kindom	dom	hivind	-	-	-	Jurkat
Q86V86	172	169	463	protdep	kindom	dom	-	-	-	-	PTMfunc
Q86V86	186	182	476	-	kindom	dom	hivind	-	-	-	Both
Q86V86	197	-	-	-	notkindom	dom	-	-	-	-	PTMfunc
O14965	143	54	348	-	kindom	dom	hivind	abundhivind	-	-	Jurkat
O14965	250	162	-	-	kindom	dom	-	-	-	-	PTMfunc
Q9UQB9	53	54	348	-	kindom	dom	hivind	abundhivind	-	-	Both
Q9UQB9	130	131	424	-	kindom	dom	hivind	abundhivind	-	-	Both
Q96GD4	31	-	279	-	notkindom	nodom	hivind	abundhivind	nearphos	-	Jurkat
Q96GD4	56	-	305	protdep	notkindom	nodom	hivind	abundhivind	-	-	Both
Q96GD4	85	52	346	protdep	kindom	dom	-	-	-	-	PTMfunc
Q96GD4	87	54	348	-	kindom	dom	hivind	abundhivind	-	-	Both
Q96GD4	115	82	-	protdep	kindom	dom	-	-	-	-	PTMfunc
Q96GD4	164	131	424	-	kindom	dom	hivind	abundhivind	-	-	Both
Q96GD4	168	135	428	-	kindom	dom	hivind	abundhivind	-	-	Both
Q96GD4	194	162	-	-	kindom	dom	hivind	abundhivind	-	-	Both
Q96GD4	202	169	463	protdep	kindom	dom	-	-	-	-	PTMfunc
Q96GD4	211	-	-	protdep	notkindom	dom	hivind	abundhivind	-	-	Both
Q96GD4	215	182	476	-	kindom	dom	hivind	abundhivind	-	-	Both
Q96GD4	287	-	-	-	notkindom	dom	hivind	abundhivind	-	-	Jurkat
Q96GD4	291	-	-	protdep	notkindom	dom	-	-	-	-	PTMfunc
Q96GD4	306	272	574	-	kindom	dom	-	-	-	-	PTMfunc
P21709	593	24	-	-	notkindom	nodom	-	-	-	-	PTMfunc
P21709	597	25	306	-	notkindom	nodom	-	-	nearphos	-	PTMfunc
P21709	787	200	499	protdep	kindom	dom	-	-	-	-	PTMfunc
Q15375	601	-	-	-	notkindom	nodom	-	-	-	-	PTMfunc
Q15375	892	298	595	-	kindom	dom	-	-	-	-	PTMfunc
P54764	735	156	450	-	kindom	dom	-	-	-	-	PTMfunc
P15056	473	60	354	-	kindom	dom	hivind	-	-	-	Jurkat
P15056	601	-	486	protind	notkindom	dom	hivind	-	nearphos	nearhot	Jurkat
P04049	365	60	354	-	kindom	dom	hivind	abundhivind	-	-	Jurkat
P04049	493	-	486	protind	notkindom	dom	hivind	abundhivind	nearphos	nearhot	Jurkat
Q9BZL6	97	-	-	-	notkindom	nodom	hivind	abundhivind	-	-	Jurkat
Q9BZL6	286	-	163	-	notkindom	nodom	-	-	-	-	PTMfunc
P32298	195	52	346	protdep	kindom	dom	hivind	abundhivind	-	-	Jurkat
P34947	174	32	-	-	notkindom	nodom	hivind	abundhivind	-	-	Jurkat
P34947	194	52	346	protdep	kindom	dom	hivind	abundhivind	-	-	Jurkat
P43250	174	32	-	-	notkindom	nodom	hivind	abundhivind	-	-	Jurkat
P43250	194	52	346	protdep	kindom	dom	hivind	abundhivind	-	-	Jurkat
P43250	343	197	497	-	kindom	dom	hivind	abundhivind	-	-	Jurkat
P43250	358	212	512	-	kindom	dom	hivind	abundhivind	-	-	Jurkat
P43250	426	276	578	-	kindom	dom	hivind	abundhivind	-	-	Jurkat
O15530	304	261	563	protind	kindom	dom	-	-	-	-	PTMfunc
P05129	197	-	-	protind	notkindom	dom	hivind	abundhivind	nearphos	-	Jurkat
P05129	199	-	-	-	notkindom	dom	hivind	abundhivind	-	-	Jurkat
P05771	141	-	-	-	notkindom	nodom	hivdep	-	-	-	Jurkat
P05771	197	-	-	-	notkindom	dom	hivind	-	-	-	Jurkat
P05771	199	-	-	-	notkindom	dom	hivind	-	-	-	Jurkat
P05771	391	93	387	protind	kindom	dom	hivind	-	-	-	Jurkat
P17252	197	-	-	protind	notkindom	dom	hivind	-	-	-	Jurkat
P17252	199	-	-	-	notkindom	dom	hivind	-	-	-	Jurkat
P17252	316	11	-	protind	notkindom	nodom	hivind	-	-	-	Jurkat
P17252	335	40	326	-	notkindom	nodom	hivind	-	-	-	Jurkat
P17252	347	52	346	-	kindom	dom	hivind	-	-	-	Jurkat
P17252	388	93	387	protind	kindom	dom	hivind	-	-	-	Jurkat
P17252	486	190	484	-	kindom	dom	hivind	-	-	-	Jurkat
P17252	621	322	-	-	notkindom	dom	hivind	-	-	-	Jurkat
Q9Y2H1	94	48	342	-	kindom	dom	-	-	-	-	PTMfunc
Q9Y2H1	215	169	463	-	kindom	dom	-	-	-	-	PTMfunc
Q9Y2H1	224	178	472	-	kindom	dom	-	-	-	-	PTMfunc
Q9Y2H1	239	192	487	protind	kindom	dom	hivind	abundhivind	-	-	Jurkat
Q9Y2H1	240	-	-	-	notkindom	dom	hivdep	abundhivind	-	-	Jurkat
Q9Y2H1	460	-	-	-	notkindom	nodom	hivind	abundhivind	-	-	Jurkat
Q15208	93	48	342	-	kindom	dom	-	-	-	-	PTMfunc
Q15208	214	169	463	protdep	kindom	dom	-	-	-	-	PTMfunc
Q15208	238	192	487	protind	kindom	dom	hivind	abundhivind	-	-	Jurkat
Q15208	239	-	-	-	notkindom	dom	hivdep	abundhivind	-	-	Jurkat
Q15208	377	293	590	-	kindom	dom	-	-	-	-	PTMfunc
Q15349	152	135	428	-	kindom	dom	hivind	-	-	-	Jurkat
P51812	72	48	342	protind	kindom	dom	-	-	-	-	PTMfunc
P51812	161	135	428	-	kindom	dom	hivind	-	-	-	Jurkat
P51812	566	-	-	-	notkindom	dom	hivind	-	-	-	Jurkat
Q15418	75	57	351	-	kindom	dom	hivind	-	-	-	Jurkat
Q15418	155	135	428	-	kindom	dom	hivind	-	-	-	Jurkat
Q15418	316	293	590	-	kindom	dom	hivind	-	-	-	Jurkat
Q15418	562	-	-	-	notkindom	dom	hivind	-	-	-	Jurkat
Q15418	667	-	-	-	notkindom	dom	hivind	-	-	-	Jurkat
P31751	30	-	-	protind	notkindom	dom	-	-	-	-	PTMfunc
P31751	277	169	463	-	kindom	dom	-	-	-	-	PTMfunc
P31751	378	267	569	protdep	kindom	dom	-	-	-	-	PTMfunc
P31749	8	-	-	protind	notkindom	dom	-	-	-	-	PTMfunc
P31749	14	-	-	-	notkindom	dom	-	-	-	-	PTMfunc
P31749	30	-	-	protdep	notkindom	dom	hivind	-	-	-	Both
P31749	39	-	-	-	notkindom	dom	hivind	-	-	-	Jurkat
P31749	276	169	463	-	kindom	dom	-	-	-	-	PTMfunc
P31749	377	267	569	-	kindom	dom	-	-	-	-	PTMfunc
P17612	48	48	342	-	kindom	dom	hivind	-	nearphos	-	Jurkat
P17612	93	93	387	protind	kindom	dom	hivind	-	-	-	Jurkat
P22694	77	77	-	-	kindom	dom	-	-	-	-	PTMfunc
P22694	93	93	387	protind	kindom	dom	hivind	-	-	-	Jurkat
P30530	523	31	-	-	notkindom	nodom	-	-	-	-	PTMfunc
P30530	540	48	342	-	kindom	dom	-	-	-	-	PTMfunc
P30530	563	69	364	-	kindom	dom	-	-	-	-	PTMfunc
P30530	590	96	391	-	kindom	dom	-	-	-	-	PTMfunc
P30530	666	161	455	-	kindom	dom	-	-	-	-	PTMfunc
P30530	714	204	504	-	kindom	dom	-	-	-	-	PTMfunc
P30530	769	257	559	-	kindom	dom	-	-	-	-	PTMfunc
Q12866	591	48	342	-	kindom	dom	-	-	-	-	PTMfunc
Q12866	856	298	595	protind	kindom	dom	-	-	-	-	PTMfunc
Q06418	582	106	400	-	kindom	dom	-	-	-	-	PTMfunc
Q06418	752	257	559	-	kindom	dom	-	-	-	-	PTMfunc
Q6J9G0	105	36	322	-	notkindom	nodom	-	-	-	-	PTMfunc
P09619	707	-	-	-	notkindom	dom	-	-	-	-	PTMfunc
P09619	838	179	473	-	kindom	dom	hivind	-	-	-	Jurkat
P07333	586	48	342	protind	kindom	dom	-	-	-	-	PTMfunc
P07333	812	194	495	protdep	kindom	dom	-	-	nearphos	nearhot	PTMfunc
P07333	867	-	550	-	notkindom	dom	-	-	-	-	PTMfunc
P07333	870	253	553	protind	kindom	dom	-	-	nearphos	-	PTMfunc
P35590	870	73	369	-	kindom	dom	hivind	-	-	-	Jurkat
P14616	1151	-	-	protind	notkindom	dom	-	-	-	-	Jurkat
P06213	1057	73	369	protind	kindom	dom	hivind	-	-	-	Jurkat
P06213	1195	-	-	protind	notkindom	dom	-	-	-	-	Jurkat
P08069	403	-	-	-	notkindom	nodom	-	-	-	-	PTMfunc
P08069	502	-	-	-	notkindom	dom	-	-	-	-	PTMfunc
P08069	1033	73	369	protind	kindom	dom	hivind	-	-	-	Both
P08069	1171	-	-	protind	notkindom	dom	-	-	-	-	Jurkat
Q07002	171	73	369	-	kindom	dom	hivind	-	-	-	Jurkat
Q00537	160	21	293	-	notkindom	nodom	-	-	-	-	PTMfunc
Q00537	194	-	-	-	notkindom	dom	-	-	-	-	PTMfunc
Q00537	197	49	343	-	kindom	dom	-	-	-	-	PTMfunc
Q00537	208	60	354	-	kindom	dom	hivind	-	nearphos	nearhot	Jurkat
Q00537	221	73	369	-	kindom	dom	hivind	-	-	-	Both
Q00537	328	182	476	-	kindom	dom	-	-	-	-	PTMfunc
Q00537	493	312	-	-	notkindom	nodom	-	-	-	-	PTMfunc
Q9UQ88	455	73	369	-	kindom	dom	hivind	-	-	-	Jurkat
Q9UQ88	552	169	463	-	kindom	dom	hivind	-	-	-	Jurkat
Q9UQ88	565	182	476	-	kindom	dom	-	-	-	-	PTMfunc
Q9UQ88	661	-	-	-	notkindom	nodom	hivind	-	-	-	Jurkat
Q9UQ88	707	294	591	-	kindom	nodom	hivind	-	-	-	Jurkat
P21127	467	73	369	-	kindom	dom	hivind	-	-	-	Jurkat
P21127	564	169	463	-	kindom	dom	hivind	-	-	-	Jurkat
P21127	673	-	-	-	notkindom	dom	hivind	-	-	-	Jurkat
P21127	719	294	591	-	kindom	dom	hivind	-	-	-	Jurkat
Q14004	943	254	554	-	kindom	dom	-	-	-	-	PTMfunc
P50750	24	49	343	-	kindom	dom	hivind	abundhivind	-	-	Jurkat
P50750	35	60	354	protdep	kindom	dom	hivind	abundhivind	-	-	Jurkat
P50750	68	94	388	-	kindom	dom	hivind	abundhivind	-	-	Jurkat
P50750	151	169	463	-	kindom	dom	hivind	abundhivind	-	-	Jurkat
P50750	164	182	476	-	kindom	dom	hivind	abundhivind	-	-	Jurkat
P50750	178	-	489	protdep	notkindom	dom	hivind	abundhivind	-	-	Jurkat
P50750	269	-	-	-	notkindom	dom	hivind	abundhivind	-	-	Jurkat
P50750	345	-	612	-	notkindom	nodom	hivind	abundhivind	-	-	Jurkat
P19784	260	250	551	protdep	kindom	dom	hivind	abundhivind	-	-	Both
P49840	268	190	484	protind	kindom	dom	hivind	abundhivind	-	-	Jurkat
P49840	355	-	-	protind	notkindom	dom	-	-	-	-	PTMfunc
P49840	360	-	-	protind	notkindom	dom	-	-	-	-	PTMfunc
P49841	205	190	484	protind	kindom	dom	hivind	abundhivind	-	-	Jurkat
P45984	166	182	476	protind	kindom	dom	hivind	abundhivind	-	-	Jurkat
P45983	166	182	476	protind	kindom	dom	hivind	-	-	-	Jurkat
P53779	204	182	476	protind	kindom	dom	hivind	abundhivind	-	-	Jurkat
O75116	121	73	369	-	kindom	dom	-	-	-	-	PTMfunc
Q9Y5S2	314	267	569	-	kindom	dom	-	-	-	-	PTMfunc
Q9Y5S2	337	293	590	-	kindom	dom	-	-	-	-	PTMfunc
Q9Y5S2	426	-	-	-	notkindom	nodom	-	-	-	-	PTMfunc
Q9Y5S2	864	-	-	-	notkindom	nodom	-	-	-	-	PTMfunc
Q6DT37	75	48	342	-	kindom	dom	-	-	-	-	PTMfunc
Q6DT37	125	97	392	-	kindom	dom	-	-	-	-	PTMfunc
Q6DT37	663	-	-	-	notkindom	nodom	-	-	-	-	PTMfunc
Q6DT37	1172	-	-	-	notkindom	dom	-	-	-	-	PTMfunc
Q6DT37	1385	-	-	-	notkindom	nodom	-	-	-	-	PTMfunc
O95382	540	-	270	-	notkindom	nodom	-	-	-	-	PTMfunc
O95382	773	169	463	-	kindom	dom	-	-	-	-	PTMfunc
O95382	910	-	-	-	notkindom	nodom	-	-	nearphos	-	PTMfunc
O95382	999	-	-	-	notkindom	nodom	-	-	-	-	PTMfunc
O95382	1024	-	-	-	notkindom	nodom	-	-	-	-	PTMfunc
Q99558	106	-	-	-	notkindom	nodom	hivind	-	-	-	Jurkat
Q99558	163	-	-	-	notkindom	nodom	hivind	-	-	-	Jurkat
Q99640	42	-	280	-	notkindom	nodom	hivind	-	nearphos	-	Jurkat
Q99640	126	60	354	-	kindom	dom	hivind	-	-	-	Jurkat
Q99640	163	96	391	-	kindom	dom	hivind	-	nearphos	-	Jurkat
Q02750	36	-	-	-	notkindom	nodom	-	-	-	-	PTMfunc
Q02750	57	29	-	-	notkindom	nodom	-	-	-	-	PTMfunc
Q02750	64	40	326	protdep	notkindom	nodom	-	-	-	-	PTMfunc
Q02750	97	73	369	-	kindom	dom	hivind	abundhivind	-	-	Jurkat
Q02750	104	80	375	-	kindom	dom	hivind	abundhivind	-	-	Both
Q02750	175	153	447	protind	kindom	dom	hivind	abundhivind	-	-	Both
Q02750	192	169	463	protdep	kindom	dom	hivind	abundhivind	-	-	Jurkat
Q02750	353	290	587	-	kindom	dom	hivind	abundhivind	-	-	Both
O14733	9	-	226	-	notkindom	nodom	hivind	abundhivind	-	-	Jurkat
P45985	140	83	377	-	kindom	dom	-	-	-	-	PTMfunc
P45985	143	86	-	-	kindom	dom	-	-	-	-	PTMfunc
P46734	243	214	514	-	kindom	dom	hivind	-	-	-	Jurkat
Q96GX5	39	48	342	-	kindom	dom	-	-	-	-	PTMfunc
Q96GX5	66	77	-	-	kindom	dom	-	-	-	-	PTMfunc
Q96GX5	158	169	463	-	kindom	dom	-	-	-	-	PTMfunc
Q96GX5	179	190	484	protdep	kindom	dom	hivind	abundhivind	-	-	Both
Q96GX5	199	-	-	-	notkindom	dom	-	-	-	-	PTMfunc
Q6P5Z2	707	190	484	-	kindom	dom	-	-	-	-	PTMfunc
Q16513	385	-	-	-	notkindom	dom	-	-	-	-	PTMfunc
Q16513	565	-	-	-	notkindom	nodom	-	-	-	-	PTMfunc
Q16513	784	169	463	-	kindom	dom	-	-	-	-	PTMfunc
Q05655	184	-	-	protind	notkindom	nodom	-	-	nearphos	-	PTMfunc
Q05655	222	-	223	-	notkindom	nodom	-	-	-	-	PTMfunc
Q05655	319	-	-	-	notkindom	nodom	-	-	-	-	PTMfunc
Q05655	336	-	-	-	notkindom	nodom	-	-	nearphos	-	PTMfunc
Q05655	362	57	351	protind	kindom	dom	-	-	-	-	PTMfunc
Q05655	613	-	-	protdep	notkindom	dom	-	-	-	-	PTMfunc
Q05655	641	-	-	protind	notkindom	dom	-	-	nearphos	-	PTMfunc
Q04759	75	-	-	-	notkindom	dom	hivind	abundhivind	-	-	Jurkat
Q04759	276	-	-	protdep	notkindom	nodom	hivind	abundhivind	-	-	Jurkat
Q04759	286	-	-	-	notkindom	nodom	hivind	abundhivind	-	-	Jurkat
Q04759	325	-	-	-	notkindom	nodom	hivind	abundhivind	-	-	Jurkat
Q04759	376	40	326	-	notkindom	nodom	hivind	abundhivind	-	-	Jurkat
Q04759	388	52	346	-	kindom	dom	hivind	abundhivind	-	-	Jurkat
Q04759	393	57	351	-	kindom	dom	hivind	abundhivind	-	-	Jurkat
Q04759	401	-	359	-	notkindom	dom	hivind	abundhivind	-	-	Jurkat
Q04759	429	93	387	-	kindom	dom	hivdep	abundhivind	-	-	Jurkat
Q04759	506	169	463	-	kindom	dom	hivind	abundhivind	-	-	Jurkat
Q04759	527	190	484	-	kindom	dom	hivind	abundhivind	-	-	Jurkat
P24723	36	-	-	protind	notkindom	dom	-	-	-	-	PTMfunc
Q86UX6	218	169	463	-	kindom	dom	-	-	-	-	PTMfunc
Q86UX6	364	-	-	-	notkindom	nodom	-	-	-	-	PTMfunc
P25098	57	-	-	protdep	notkindom	dom	-	-	-	-	PTMfunc
P25098	62	-	-	-	notkindom	dom	hivind	abundhivind	-	-	Both
P25098	170	-	304	protdep	notkindom	dom	hivind	abundhivind	-	-	Both
P25098	210	63	357	-	kindom	dom	hivind	abundhivind	-	-	Jurkat
P25098	215	68	363	-	kindom	dom	hivind	abundhivind	-	-	Jurkat
P25098	230	83	377	-	kindom	dom	hivind	abundhivind	-	-	Jurkat
P25098	344	-	-	protdep	notkindom	dom	hivind	abundhivind	-	-	Jurkat
P25098	345	-	-	-	notkindom	dom	hivind	abundhivind	-	-	Jurkat
P25098	448	293	590	-	kindom	dom	hivind	abundhivind	-	-	Jurkat
P25098	677	-	-	protdep	notkindom	nodom	-	-	-	-	PTMfunc
P35626	62	-	-	-	notkindom	dom	hivind	abundhivind	-	-	Jurkat
P35626	210	63	357	-	kindom	dom	hivind	abundhivind	-	-	Jurkat
P35626	215	68	363	-	kindom	dom	hivind	abundhivind	-	-	Jurkat
P35626	230	83	377	-	kindom	dom	hivind	abundhivind	-	-	Jurkat
P35626	344	-	-	protdep	notkindom	dom	hivind	abundhivind	-	-	Jurkat
P35626	345	-	-	-	notkindom	dom	hivind	abundhivind	-	-	Jurkat
P35626	454	299	596	-	notkindom	nodom	hivind	abundhivind	-	-	Jurkat
Q96RU8	233	192	487	-	kindom	dom	-	-	-	-	PTMfunc
Q96RR4	194	73	369	-	kindom	dom	hivind	-	-	-	Jurkat
Q96RR4	401	250	551	-	kindom	dom	hivind	-	-	-	Jurkat
Q96RR4	403	253	553	-	kindom	dom	hivind	-	-	-	Jurkat
Q32MK0	766	294	591	-	kindom	dom	-	-	-	-	PTMfunc
Q32MK0	776	304	-	-	notkindom	nodom	-	-	-	-	PTMfunc
Q32MK0	792	327	-	-	notkindom	nodom	-	-	-	-	PTMfunc
O15075	280	-	-	-	notkindom	nodom	hivind	-	-	-	Jurkat
O15075	286	-	-	-	notkindom	nodom	hivind	-	-	-	Jurkat
Q9BUB5	353	272	574	-	kindom	dom	hivind	-	-	-	Jurkat
Q9HBH9	326	-	-	-	notkindom	dom	-	-	-	-	PTMfunc
Q9HBH9	347	272	574	-	kindom	dom	hivind	-	-	-	Jurkat
Q9UK32	86	-	-	-	notkindom	dom	hivind	-	nearphos	nearhot	Jurkat
Q9UK32	570	190	484	-	kindom	dom	hivind	-	-	-	Both
O75676	37	-	-	protdep	notkindom	dom	-	-	nearphos	nearhot	PTMfunc
O75676	191	-	-	-	notkindom	dom	-	-	-	-	PTMfunc
O75676	440	73	369	protdep	kindom	dom	-	-	-	-	PTMfunc
O75676	532	169	463	protind	kindom	dom	-	-	-	-	PTMfunc
O75676	548	182	476	-	kindom	dom	-	-	-	-	PTMfunc
O95747	52	-	-	-	notkindom	dom	hivdep	abundhivind	-	-	Jurkat
Q8N4C8	46	-	359	protind	notkindom	dom	hivind	-	-	-	Jurkat
Q8N4C8	91	-	-	-	notkindom	dom	hivind	-	-	-	Jurkat
Q8N4C8	155	169	463	-	kindom	dom	hivind	-	-	-	Jurkat
Q8N4C8	1103	-	-	-	notkindom	dom	hivdep	-	-	-	Jurkat
O95819	46	-	359	protind	notkindom	dom	hivind	-	-	-	Jurkat
O95819	91	-	-	-	notkindom	dom	hivind	-	-	-	Jurkat
O95819	155	169	463	-	kindom	dom	hivind	-	-	-	Jurkat
O95819	957	-	-	-	notkindom	dom	hivind	-	-	-	Jurkat
O95819	1010	-	-	-	notkindom	dom	hivdep	-	-	-	Jurkat
Q9UKE5	46	-	359	protind	notkindom	dom	hivind	-	-	-	Jurkat
Q9UKE5	91	-	-	-	notkindom	dom	hivind	-	-	-	Jurkat
Q9UKE5	155	169	463	-	kindom	dom	hivind	-	-	-	Jurkat
Q9UKE5	1131	-	-	-	notkindom	dom	hivdep	-	-	-	Jurkat
Q92918	33	60	354	-	kindom	dom	hivind	abundhivind	-	-	Jurkat
Q92918	46	73	369	-	kindom	dom	hivind	abundhivind	-	-	Jurkat
Q92918	600	-	-	-	notkindom	dom	hivind	abundhivind	-	-	Jurkat
Q12851	32	60	354	protdep	kindom	dom	hivind	-	-	-	Both
Q9Y4K4	500	-	-	-	notkindom	nodom	-	-	-	-	PTMfunc
Q9UL54	153	169	463	-	kindom	dom	-	-	-	-	PTMfunc
Q7L7X3	484	-	-	-	notkindom	nodom	hivind	abundhivind	-	-	Jurkat
Q7L7X3	818	-	-	-	notkindom	nodom	-	-	-	-	PTMfunc
Q13188	177	-	-	protind	notkindom	dom	hivind	abundhivind	-	-	Jurkat
Q13043	119	-	-	-	notkindom	dom	-	-	nearphos	-	PTMfunc
Q13043	180	-	-	protind	notkindom	dom	hivind	abundhivind	nearphos	nearhot	Jurkat
Q9H2G2	179	191	485	protind	kindom	dom	hivind	abundhivind	nearphos	nearhot	Jurkat
Q9H2G2	319	309	609	-	notkindom	nodom	-	-	-	-	PTMfunc
Q9H2G2	337	-	619	-	notkindom	nodom	-	-	nearphos	-	PTMfunc
Q9H2G2	384	-	-	-	notkindom	nodom	-	-	-	-	PTMfunc
Q9H2G2	492	-	-	-	notkindom	nodom	-	-	-	-	PTMfunc
Q9H2G2	524	-	-	-	notkindom	nodom	-	-	nearphos	-	PTMfunc
Q9H2G2	663	-	-	-	notkindom	nodom	-	-	-	-	PTMfunc
Q9H2G2	775	-	-	-	notkindom	nodom	-	-	nearphos	-	PTMfunc
O94804	159	169	463	-	kindom	dom	-	-	-	-	PTMfunc
O94804	181	191	485	-	kindom	dom	-	-	nearphos	nearhot	PTMfunc
Q8TD19	199	190	484	-	kindom	dom	-	-	-	-	PTMfunc
Q8TD19	327	-	-	-	notkindom	nodom	-	-	nearphos	-	PTMfunc
Q8TD19	525	-	-	-	notkindom	nodom	-	-	-	-	PTMfunc
P51955	143	169	463	-	kindom	dom	-	-	-	-	PTMfunc
P51955	152	178	472	-	kindom	dom	hivind	-	-	-	Both
P51955	156	182	476	-	kindom	dom	hivind	-	-	-	Both
P51955	174	197	497	-	kindom	dom	hivind	-	nearphos	nearhot	Both
P51955	353	-	-	-	notkindom	nodom	-	-	nearphos	-	PTMfunc
P51955	359	-	-	-	notkindom	nodom	hivdep	-	nearphos	-	Both
P51955	362	-	-	-	notkindom	nodom	-	-	-	-	PTMfunc
P51955	381	-	-	-	notkindom	nodom	-	-	-	-	PTMfunc
P51955	391	-	-	-	notkindom	nodom	-	-	-	-	PTMfunc
P51955	407	-	-	-	notkindom	nodom	-	-	-	-	PTMfunc
Q13627	453	267	569	-	kindom	dom	-	-	-	-	PTMfunc
Q9H422	341	182	476	-	kindom	dom	hivind	-	-	-	Jurkat
Q9H422	428	-	-	-	notkindom	dom	-	-	-	-	PTMfunc
Q9H422	459	-	-	protind	notkindom	dom	-	-	-	-	PTMfunc
Q9H422	813	-	-	-	notkindom	nodom	-	-	-	-	PTMfunc
Q9H422	891	-	-	-	notkindom	nodom	-	-	-	-	PTMfunc
Q86Z02	120	4	-	-	notkindom	nodom	hivind	-	-	-	Jurkat
Q86Z02	334	182	476	-	kindom	dom	hivind	-	-	-	Jurkat
Q86Z02	421	-	-	-	notkindom	dom	hivind	-	-	-	Jurkat
Q86Z02	543	-	-	-	notkindom	nodom	hivind	-	-	-	Jurkat
Q9H2X6	343	182	476	-	kindom	dom	hivind	-	-	-	Jurkat
Q9H2X6	430	-	-	-	notkindom	dom	hivind	-	-	-	Jurkat
Q9H2X6	552	-	-	-	notkindom	nodom	hivind	-	-	-	Jurkat
P53350	9	-	-	-	notkindom	nodom	-	abundhivdep	nearphos	-	Jurkat
P53350	38	-	-	-	notkindom	nodom	-	-	-	-	PTMfunc
P53350	200	191	485	-	kindom	dom	-	-	-	-	PTMfunc
P53350	272	260	562	-	kindom	dom	-	-	-	-	PTMfunc
P53350	338	-	-	-	notkindom	nodom	-	-	nearphos	-	PTMfunc
P53350	474	-	-	-	notkindom	dom	-	-	-	-	PTMfunc
P53350	480	-	-	protind	notkindom	nodom	-	-	-	-	PTMfunc
P53350	492	-	-	-	notkindom	nodom	-	-	-	-	PTMfunc
P53350	589	-	-	-	notkindom	nodom	-	-	-	-	PTMfunc
Q9NYY3	24	-	298	-	notkindom	nodom	-	-	-	-	PTMfunc
Q9NYY3	80	42	328	-	notkindom	nodom	-	-	-	-	PTMfunc
Q9NYY3	194	156	450	-	kindom	dom	-	-	-	-	PTMfunc
Q9NYY3	207	169	463	-	kindom	dom	-	-	-	-	PTMfunc
Q9NYY3	317	276	578	-	kindom	dom	-	-	-	-	PTMfunc
Q9NYY3	375	-	-	-	notkindom	nodom	-	-	-	-	PTMfunc
Q9NYY3	376	-	-	-	notkindom	nodom	-	-	-	-	PTMfunc
Q9NYY3	378	-	-	-	notkindom	nodom	-	-	-	-	PTMfunc
Q9NYY3	390	-	-	protdep	notkindom	nodom	-	-	-	-	PTMfunc
Q9NYY3	438	-	-	protdep	notkindom	nodom	-	-	-	-	PTMfunc
Q9NYY3	670	-	-	-	notkindom	dom	-	-	-	-	PTMfunc
Q8IW41	123	142	436	-	kindom	dom	hivind	-	-	-	Jurkat
O00444	321	343	-	-	notkindom	nodom	hivind	-	-	-	Jurkat
O14757	166	198	498	-	kindom	dom	hivind	abundhivind	-	-	Jurkat
O14757	180	212	512	-	kindom	dom	hivind	abundhivind	-	-	Jurkat
O14757	383	-	-	-	notkindom	nodom	hivind	abundhivind	-	-	Jurkat
Q14680	44	77	-	protdep	kindom	dom	-	-	-	-	PTMfunc
Q14680	55	90	384	-	kindom	dom	hivind	-	nearphos	-	Both
Q14680	62	96	391	-	kindom	dom	hivind	-	-	-	Both
Q14680	134	169	463	-	kindom	dom	-	-	-	-	PTMfunc
Q14680	145	180	474	-	kindom	dom	hivind	-	-	-	Both
Q14680	147	182	476	-	kindom	dom	hivind	-	-	-	Jurkat
Q14680	158	192	487	-	kindom	dom	hivind	-	-	-	Jurkat
Q14680	395	-	-	protdep	notkindom	nodom	hivind	-	nearphos	-	Both
Q14680	406	-	-	-	notkindom	nodom	-	-	nearphos	-	PTMfunc
Q14680	434	-	-	protdep	notkindom	nodom	-	-	nearphos	-	PTMfunc
Q14680	481	-	-	protind	notkindom	nodom	-	-	nearphos	-	PTMfunc
Q14680	491	-	-	-	notkindom	nodom	-	-	nearphos	-	PTMfunc
Q14680	536	-	-	-	notkindom	nodom	-	-	nearphos	-	PTMfunc
Q14680	632	-	-	-	notkindom	dom	-	-	-	-	PTMfunc
Q14680	650	-	-	-	notkindom	dom	hivind	-	-	-	Jurkat
P57059	35	52	346	-	kindom	dom	-	-	-	-	PTMfunc
P57059	42	59	353	-	kindom	dom	-	-	-	-	PTMfunc
P57059	50	67	362	-	kindom	dom	-	-	-	-	PTMfunc
P57059	88	106	400	-	kindom	dom	-	-	-	-	PTMfunc
P57059	151	169	463	-	kindom	dom	-	-	-	-	PTMfunc
P57059	175	192	487	-	kindom	dom	-	-	-	-	PTMfunc
P57059	584	-	-	-	notkindom	nodom	-	-	-	-	PTMfunc
P57059	597	-	-	-	notkindom	nodom	-	-	-	-	PTMfunc
P57059	604	-	-	-	notkindom	nodom	-	-	-	-	PTMfunc
Q9H0K1	28	52	346	-	kindom	dom	-	-	nearphos	-	PTMfunc
Q9H0K1	100	125	418	-	kindom	dom	-	-	-	-	PTMfunc
Q9H0K1	144	169	463	-	kindom	dom	-	-	-	-	PTMfunc
Q9H0K1	258	280	582	-	kindom	dom	-	-	-	-	PTMfunc
Q9H0K1	269	296	593	-	kindom	dom	-	-	-	-	PTMfunc
Q9H0K1	313	335	-	-	notkindom	dom	-	-	-	-	PTMfunc
Q9H0K1	367	-	-	-	notkindom	nodom	-	-	-	-	PTMfunc
Q9H0K1	536	-	-	protind	notkindom	nodom	-	-	-	-	PTMfunc
Q9H0K1	692	-	-	-	notkindom	nodom	-	-	-	-	PTMfunc
Q9H0K1	702	-	-	-	notkindom	nodom	-	-	-	-	PTMfunc
Q6PHR2	345	-	-	-	notkindom	dom	hivind	abundhivind	-	-	Jurkat
O75385	162	182	476	-	kindom	dom	hivind	abundhivind	-	-	Jurkat
P52333	191	-	-	-	notkindom	dom	hivind	-	-	-	Jurkat
P52333	830	52	346	-	kindom	dom	hivind	-	-	-	Jurkat
P23458	86	-	-	-	notkindom	dom	-	-	-	-	PTMfunc
P23458	213	-	-	-	notkindom	dom	-	-	-	-	PTMfunc
P23458	227	-	-	-	notkindom	dom	-	-	nearphos	-	PTMfunc
P23458	245	-	-	protind	notkindom	dom	hivind	abundhivind	-	-	Both
P23458	249	-	-	protind	notkindom	dom	hivind	abundhivind	-	-	Both
P23458	254	-	-	-	notkindom	dom	hivind	abundhivind	-	-	Jurkat
P23458	269	-	-	-	notkindom	dom	-	-	-	-	PTMfunc
P23458	859	-	312	-	notkindom	nodom	-	-	-	-	PTMfunc
P23458	860	-	313	-	notkindom	nodom	-	-	-	-	PTMfunc
P23458	924	91	385	-	kindom	dom	-	-	-	-	PTMfunc
P29597	756	-	206	-	notkindom	dom	hivind	abundhivind	-	-	Both
Q14289	188	-	52	protdep	notkindom	dom	-	-	-	-	PTMfunc
Q14289	944	-	-	protind	notkindom	nodom	-	-	-	-	PTMfunc
Q01974	489	60	354	-	kindom	dom	-	-	-	-	PTMfunc
Q08345	112	-	-	-	notkindom	dom	-	-	-	-	PTMfunc
Q08345	153	-	-	protdep	notkindom	dom	-	-	-	-	PTMfunc
Q16832	119	-	-	-	notkindom	dom	-	-	-	-	PTMfunc
P51813	413	40	326	-	notkindom	nodom	-	-	-	-	PTMfunc
Q06187	322	-	-	protind	notkindom	dom	-	-	-	-	PTMfunc
Q06187	406	48	342	protind	kindom	dom	-	-	-	-	PTMfunc
Q06187	536	182	476	-	kindom	dom	-	-	-	-	PTMfunc
O14730	102	-	-	-	notkindom	nodom	hivind	-	-	-	Jurkat
O14730	108	-	-	-	notkindom	nodom	hivind	-	-	-	Both
O14730	146	-	-	-	notkindom	nodom	-	-	-	-	PTMfunc
O14730	165	-	-	-	notkindom	nodom	-	-	-	-	PTMfunc
O14730	207	-	271	-	notkindom	nodom	hivind	-	-	-	Both
O14730	290	-	-	-	notkindom	dom	-	-	-	-	PTMfunc
O14730	300	41	327	protind	notkindom	dom	hivind	-	-	-	Both
O14730	318	57	351	-	kindom	dom	-	-	-	-	PTMfunc
O14730	452	207	507	-	kindom	dom	-	-	-	-	PTMfunc
O14730	456	211	511	-	kindom	dom	-	-	-	-	PTMfunc
O14730	508	276	578	-	kindom	dom	-	-	-	-	PTMfunc
Q9BVS4	86	-	-	-	notkindom	nodom	hivind	abundhivind	-	-	Both
Q9BVS4	270	216	516	-	kindom	nodom	hivind	abundhivind	-	-	Jurkat
Q9BVS4	288	234	534	-	kindom	dom	hivind	abundhivind	-	-	Both
Q9BVS4	377	329	-	-	notkindom	dom	-	-	nearphos	-	PTMfunc
Q8IWU2	430	310	610	-	notkindom	nodom	-	-	-	-	PTMfunc
Q13546	115	144	438	-	kindom	dom	-	-	-	-	PTMfunc
Q13546	316	-	-	-	notkindom	nodom	-	-	nearphos	-	PTMfunc
Q13546	377	-	-	-	notkindom	nodom	-	-	-	-	PTMfunc
Q13546	571	-	-	-	notkindom	nodom	-	-	-	-	PTMfunc
Q13546	604	-	-	-	notkindom	dom	-	-	-	-	PTMfunc
Q13546	627	-	-	-	notkindom	dom	-	-	-	-	PTMfunc
O15111	296	-	-	protdep	notkindom	dom	-	-	-	-	PTMfunc
Q9UHD2	137	169	463	-	kindom	dom	-	-	-	-	PTMfunc
Q9UHD2	154	182	476	protdep	kindom	dom	-	-	nearphos	-	PTMfunc
Q9UHD2	241	277	579	-	kindom	dom	hivind	abundhivind	-	-	Both
Q9UHD2	344	-	-	-	notkindom	dom	-	-	-	-	PTMfunc
Q9UHD2	396	-	-	protdep	notkindom	nodom	-	-	-	-	PTMfunc
Q9UHD2	504	-	-	protdep	notkindom	nodom	-	-	-	-	PTMfunc
Q9UHD2	584	-	-	-	notkindom	nodom	-	-	-	-	PTMfunc
Q9UHD2	661	-	-	-	notkindom	nodom	-	-	-	-	PTMfunc
O00418	65	-	-	protind	notkindom	nodom	-	-	nearphos	-	PTMfunc
O00418	162	-	-	protind	notkindom	dom	-	-	-	-	PTMfunc
O00418	238	-	-	protind	notkindom	dom	-	-	nearphos	-	PTMfunc
O00418	341	-	-	protind	notkindom	nodom	hivind	abundhivind	-	-	Both
O00418	347	-	-	protind	notkindom	nodom	hivind	abundhivind	nearphos	-	Both
O00418	603	-	-	-	notkindom	nodom	hivind	abundhivind	nearphos	-	Both
Q8IZE3	272	-	-	protind	notkindom	nodom	-	-	-	-	PTMfunc
Q58A45	594	-	160	-	notkindom	dom	hivind	-	-	-	Jurkat
Q58A45	651	-	-	-	notkindom	dom	hivind	-	-	-	Jurkat
Q16654	38	-	-	-	notkindom	nodom	-	-	-	-	PTMfunc
Q16654	111	-	25	protdep	notkindom	nodom	-	-	-	-	PTMfunc
Q16654	122	-	-	-	notkindom	nodom	-	-	-	-	PTMfunc
Q16654	142	-	-	-	notkindom	dom	-	-	-	-	PTMfunc
Q16654	226	-	-	-	notkindom	dom	-	-	-	-	PTMfunc
Q16654	380	77	-	-	kindom	nodom	-	-	-	-	PTMfunc
Q16654	384	-	-	-	notkindom	nodom	-	-	-	-	PTMfunc
Q9BQI3	175	52	346	protind	kindom	dom	-	-	-	-	PTMfunc
Q9BQI3	303	-	-	-	notkindom	dom	-	-	-	-	PTMfunc
Q9BQI3	458	182	476	-	kindom	dom	-	-	-	-	PTMfunc
Q9BQI3	472	-	-	-	notkindom	dom	-	-	-	-	PTMfunc
Q99570	68	96	391	-	kindom	dom	-	-	-	-	PTMfunc
Q99570	89	129	422	-	kindom	dom	-	-	-	-	PTMfunc
Q99570	97	-	-	-	notkindom	dom	hivind	abundhivind	-	-	Both
Q99570	280	281	583	-	kindom	dom	-	-	-	-	PTMfunc
Q99570	309	-	-	protdep	notkindom	dom	hivind	abundhivind	-	-	Both
Q99570	443	-	-	-	notkindom	nodom	hivind	abundhivind	-	-	Both
Q99570	449	-	-	protdep	notkindom	nodom	-	-	-	-	PTMfunc
Q99570	553	-	-	-	notkindom	nodom	-	-	-	-	PTMfunc
Q99570	773	-	-	-	notkindom	nodom	-	-	-	-	PTMfunc
Q99570	791	-	-	-	notkindom	nodom	-	-	-	-	PTMfunc
Q99570	850	-	-	-	notkindom	nodom	-	-	nearphos	-	PTMfunc
Q99570	888	-	-	-	notkindom	nodom	-	-	-	-	PTMfunc
Q99570	951	-	-	-	notkindom	nodom	hivind	abundhivind	-	-	Both
Q99570	1293	-	-	protind	notkindom	nodom	-	-	nearphos	-	PTMfunc
Q99570	1307	-	-	-	notkindom	nodom	-	-	-	-	PTMfunc
O00311	212	-	-	-	notkindom	dom	-	-	-	-	PTMfunc
O00311	253	-	-	-	notkindom	dom	hivind	-	-	-	Jurkat
Q8IV63	229	111	405	-	kindom	dom	-	-	-	-	PTMfunc
Q8IV63	275	-	-	-	notkindom	dom	-	-	-	-	PTMfunc
Q99986	16	-	-	-	notkindom	nodom	-	-	-	-	PTMfunc
Q99986	98	111	405	-	kindom	dom	hivind	abundhivind	-	-	Jurkat
Q99986	112	123	416	protdep	kindom	dom	-	-	-	-	PTMfunc
Q99986	147	-	-	-	notkindom	dom	hivind	abundhivind	-	-	Jurkat
Q99986	188	-	-	-	notkindom	dom	-	-	-	-	PTMfunc
Q99986	301	268	570	-	kindom	dom	hivind	abundhivind	-	-	Both
Q99986	329	304	-	protdep	notkindom	nodom	hivind	abundhivind	-	-	Both
Q86Y07	33	48	342	-	kindom	dom	-	-	-	-	PTMfunc
Q86Y07	75	94	388	-	kindom	dom	-	-	-	-	PTMfunc
Q86Y07	112	-	-	-	notkindom	dom	-	-	-	-	PTMfunc
Q86Y07	177	-	-	-	notkindom	dom	-	-	-	-	PTMfunc
Q86Y07	200	-	492	-	notkindom	dom	-	-	-	-	PTMfunc
Q86Y07	223	213	513	-	kindom	dom	-	-	-	-	PTMfunc
Q86Y07	255	244	546	protdep	kindom	dom	-	-	-	-	PTMfunc
Q86Y07	264	-	-	-	notkindom	dom	-	-	-	-	PTMfunc
Q86Y07	328	-	-	-	notkindom	nodom	-	-	-	-	PTMfunc
Q86Y07	383	-	-	-	notkindom	nodom	-	-	-	-	PTMfunc
Q86Y07	402	-	-	-	notkindom	nodom	-	-	-	-	PTMfunc
Q86Y07	443	-	-	protind	notkindom	nodom	-	-	nearphos	-	PTMfunc
O14976	175	169	463	-	kindom	dom	hivind	abundhivind	-	-	Both
O14976	325	309	609	-	notkindom	nodom	-	-	-	-	PTMfunc
O14976	390	-	-	-	notkindom	nodom	hivind	abundhivind	-	-	Jurkat
O14976	432	-	-	-	notkindom	dom	-	-	-	-	PTMfunc
Q9Y616	379	244	546	protdep	kindom	dom	-	-	-	-	PTMfunc
P51617	134	-	-	-	notkindom	nodom	-	-	nearphos	-	PTMfunc
P51617	180	-	-	-	notkindom	nodom	-	-	-	-	PTMfunc
P51617	342	169	463	-	kindom	dom	-	-	-	-	PTMfunc
P51617	355	182	476	protdep	kindom	dom	-	-	-	-	PTMfunc
P51617	397	-	-	-	notkindom	dom	hivind	-	-	-	Both
Q8NI60	246	-	-	-	notkindom	nodom	-	-	-	-	PTMfunc
Q8NI60	295	-	-	-	notkindom	nodom	-	-	-	-	PTMfunc
Q8NI60	310	-	-	-	notkindom	nodom	-	-	-	-	PTMfunc
Q8NI60	314	-	-	-	notkindom	nodom	-	-	-	-	PTMfunc
Q8NI60	327	-	-	-	notkindom	nodom	-	-	-	-	PTMfunc
Q8NI60	642	-	-	-	notkindom	nodom	-	-	-	-	PTMfunc
Q96D53	424	-	-	-	notkindom	nodom	-	-	-	-	PTMfunc
Q9BXM7	186	-	-	-	notkindom	dom	-	-	-	-	PTMfunc
Q9BXM7	319	78	373	-	kindom	dom	hivdep	-	-	-	Both
O60229	1218	-	-	-	notkindom	nodom	hivdep	-	-	-	Jurkat
O60566	210	-	-	-	notkindom	dom	-	-	-	-	PTMfunc
O60566	250	-	-	-	notkindom	nodom	hivind	abundhivind	-	-	Jurkat
O60566	475	-	-	-	notkindom	nodom	-	-	-	-	PTMfunc
O60566	629	-	-	-	notkindom	nodom	-	-	-	-	PTMfunc
O60566	995	268	570	-	kindom	dom	-	-	-	-	PTMfunc
O43683	175	-	-	-	notkindom	dom	-	-	nearphos	-	PTMfunc
O43683	187	-	-	-	notkindom	nodom	-	-	-	-	PTMfunc
O43683	663	-	-	-	notkindom	nodom	hivind	abundhivind	nearphos	-	Jurkat
O43683	756	4	-	-	notkindom	nodom	-	-	nearphos	-	PTMfunc
Q13233	1176	-	-	-	notkindom	nodom	-	-	-	-	PTMfunc
Q13233	1398	-	-	-	notkindom	dom	-	-	-	-	PTMfunc
P33981	86	-	-	protdep	notkindom	nodom	hivind	abundhivind	-	-	Both
P33981	168	-	-	-	notkindom	nodom	hivind	abundhivind	-	-	Jurkat
P33981	372	-	-	-	notkindom	nodom	-	-	nearphos	-	PTMfunc
P33981	385	-	-	-	notkindom	nodom	-	-	nearphos	-	PTMfunc
P33981	434	-	206	-	notkindom	nodom	hivind	abundhivind	nearphos	-	Jurkat
P33981	529	48	342	-	kindom	dom	hivind	abundhivind	-	-	Jurkat
P33981	538	57	351	-	kindom	dom	hivind	abundhivind	-	-	Both
P33981	546	80	375	-	kindom	dom	hivind	abundhivind	-	-	Both
P33981	547	-	-	-	notkindom	dom	hivind	abundhivind	-	-	Jurkat
P33981	696	-	-	-	notkindom	dom	-	-	-	-	PTMfunc
P33981	827	-	-	-	notkindom	nodom	hivind	abundhivind	nearphos	-	Both
P33981	830	-	-	-	notkindom	nodom	hivind	abundhivind	nearphos	-	Jurkat
P33981	848	-	-	protdep	notkindom	nodom	-	-	nearphos	-	PTMfunc
Q86UE8	156	-	-	-	notkindom	nodom	-	-	-	-	PTMfunc
Q9Y478	57	-	-	-	notkindom	-	-	-	-	PTMfunc
Q8N2I9	231	-	-	-	notkindom	dom	hivind	-	-	-	Jurkat
Q96S44	40	51	345	-	kindom	dom	hivind	abundhivind	-	-	Both
Q96S44	134	-	-	-	notkindom	dom	-	-	nearphos	-	PTMfunc
Q8TAS1	383	-	-	protdep	notkindom	dom	hivind	-	-	-	Jurkat
Q8TAS1	387	-	-	-	notkindom	dom	hivind	-	-	-	Jurkat
Q8N165	187	191	485	-	kindom	dom	-	-	-	-	PTMfunc
Q8N165	271	-	-	-	notkindom	dom	-	-	-	-	PTMfunc
Q8N165	335	302	-	-	notkindom	nodom	hivind	-	-	-	Jurkat
Q7RTN6	239	201	500	-	kindom	dom	-	-	-	-	PTMfunc
Q8NB16	372	201	500	-	kindom	dom	-	-	nearphos	nearhot	PTMfunc
Q96KB5	87	94	388	-	kindom	dom	hivind	abundhivind	-	-	Jurkat
Q96KB5	90	96	391	-	kindom	dom	-	-	-	-	PTMfunc
Q96KB5	169	169	463	-	kindom	dom	-	-	-	-	PTMfunc
Q13418	85	-	-	protdep	notkindom	nodom	hivind	abundhivind	-	-	Both
Q13418	139	-	-	-	notkindom	nodom	-	-	-	-	PTMfunc
Q13418	165	21	293	protind	notkindom	nodom	-	-	-	-	PTMfunc
Q13418	170	23	302	-	notkindom	nodom	-	-	nearphos	-	PTMfunc
Q13418	191	42	328	protind	notkindom	nodom	-	-	-	-	PTMfunc
Q13418	198	49	343	-	kindom	dom	hivind	abundhivind	-	-	Both
Q13418	209	60	354	protdep	kindom	dom	hivind	abundhivind	-	-	Both
Q13418	220	-	-	-	notkindom	dom	-	-	-	-	PTMfunc
Q13418	341	190	484	-	kindom	dom	-	-	nearphos	nearhot	PTMfunc
Q13418	438	283	585	-	kindom	dom	-	-	-	-	PTMfunc
Q13418	448	298	595	protdep	kindom	nodom	-	-	-	-	PTMfunc
